# Supplementary material
Source: Research Square preprint supplement (doi:10.21203/rs.3.rs-9206006/v1)
Supplement: Supplementary file 1 [file 9737b75a312e9820be5b8b96.xlsx]

## Sheet: Sheet1
Step	Well Position	Procedure	Waiting Time (min)	Mixing Time (min)	Magnetization Cycles	Mixing Speed	Volume (μL)	Temperature Status	Temperature (℃)
1	1	Lysis/Binding	0	3	0	Fast	950	Well 1 & 2	70
2	2	Lysis/Binding	0	3	0	Fast	950	Well 1 & 2	70
3	1	Lysis/Binding	0	3	2	Fast	950	Well 1 & 2	70
4	2	Lysis/Binding	0	3	2	Fast	950	Well 1 & 2	70
5	3	Washing	0	2	1	Fast	800	Off	0
6	4	Washing	0	1	1	Fast	800	Off	0
7	5	Washing	0	1	1	Fast	800	Off	0
8	6	Drying	3	0	0	Slow	100	Off	0
9	6	Elution	0	3	2	Medium	100	Well 6	70
10	3	Magnetic Beads Removal	0	1	0	Medium	600	Off	0
